# Supplementary material for: Synthetic shRNAs as potent RNAi triggers
Source: Springer Nature journal article supplement (doi:10.1038/nbt1052), 2004-12-26
Supplement: nbt1052-S4.pdf [file nbt1052-S4.pdf]

**Supplementary Table 1 Sequences of the siRNAs used in this study**

| <b>Gene</b> | <b>Accession number</b> | <b>Target sequence ID</b> | <b>Target sequence</b> |
|-------------|-------------------------|---------------------------|------------------------|
| IGF1R       | NM_000875               | IGF1R-1                   | GGAUGCACCAUCUUCAAGG    |
| IGF1R       | NM_000875               | IGF1R-2                   | GACAAAUCCCAUCAGGA      |
| IGF1R       | NM_000875               | IGF1R-3                   | ACCGCAAAGUCUUUGAGAA    |
| IGF1R       | NM_000875               | IGF1R-4                   | GUCCUGACAUGCUGUUUGA    |
| IGF1R       | NM_000875               | IGF1R-5                   | GACCACCAUCAACAAUGAG    |
| IGF1R       | NM_000875               | IGF1R-6                   | CAAUUUAUGUGUUUCCGAA    |
| IGF1R       | NM_000875               | IGF1R-7                   | CGCAUGUGCUGGCAGUAUA    |
| IGF1R       | NM_000875               | IGF1R-8                   | CCGAAGAUUUCACAGUCA     |
| IGF1R       | NM_000875               | IGF1R-9                   | ACCAUUGAUUCUGUUACUU    |
| KIF11       | NM_004523               | KIF11-1                   | CUGACAAGAGCUC AAGGAA   |
| KIF11       | NM_004523               | KIF11-2                   | CGUUCUGGAGCUGUUGAUA    |
| KIF11       | NM_004523               | KIF11-3                   | GAGCCCAGAUCAACCUUUA    |
| KIF11       | NM_004523               | KIF11-4                   | GGCAUUAACACACUGGAGA    |
| KIF11       | NM_004523               | KIF11-5                   | GAUGGCAGCUC AAGCAAA    |
| KIF11       | NM_004523               | KIF11-6                   | CAGCAGAAAUCUAAGGAUA    |
| KIF11       | NM_004523               | KIF11-7                   | GACCUGUGCCUUUAGAGA     |
| KIF11       | NM_004523               | KIF11-8                   | AAAGGACAACUGCAGCUAC    |
| KIF11       | NM_004523               | KIF11-9                   | GACUUCAUUGACAGUGGCC    |
| KIF14       | NM_014875               | KIF14-1                   | CAGGGAUGCUGUUUGGAUA    |
| KIF14       | NM_014875               | KIF14-2                   | ACUGACAACAAAGUCAGC     |
| KIF14       | NM_014875               | KIF14-3                   | AAACUGGGAGGCUCUUAC     |
| KIF14       | NM_014875               | KIF14-4                   | CACUGAAUGUGGGAGGUGA    |
| KIF14       | NM_014875               | KIF14-5                   | GUCUGGGUGGAAAUUCAA     |
| KIF14       | NM_014875               | KIF14-6                   | CAUCUUUGCUGAAUCGAAA    |
| KIF14       | NM_014875               | KIF14-7                   | GGGAUUGACGGCAGUAAGA    |
| KIF14       | NM_014875               | KIF14-8                   | CAGGUAAAGUCAGAGACAU    |
| KIF14       | NM_014875               | KIF14-9                   | CUCACAUUGUCCACCAGGA    |
| MAPK14      | NM_139012               | MAPK14-1                  | AAUAUCCUCAGGGGUGGAG    |
| MAPK14      | NM_139012               | MAPK14-2                  | GUGCCUCUUGUUGCAGAGA    |
| MAPK14      | NM_139012               | MAPK14-3                  | GAAGCUCUCCAGACCAUUU    |
| MAPK14      | NM_001315               | MAPK14-4                  | CUCCUGAGAUCAUGCUGAA    |
| MAPK14      | NM_001315               | MAPK14-5                  | GCUGUUGACUGGAAGAACA    |
| MAPK14      | NM_001315               | MAPK14-6                  | GGAAUUCAAUGAUGUGUAU    |
| MAPK14      | NM_001315               | MAPK14-7                  | CCAUUUCAGUCCAUCAUUC    |
| PLK         | NM_005030               | PLK-1                     | CCCUGUGUGGGACUCCUAA    |
| PLK         | NM_005030               | PLK-2                     | CCGAGUUUAUCAUCGAGAC    |
| PLK         | NM_005030               | PLK-3                     | GUUCUUUACUUCUGGCUAU    |
| PLK         | NM_005030               | PLK-4                     | CGCCUCAUCCUCUACAAUG    |
| PLK         | NM_005030               | PLK-5                     | AAGAGACCUACCUCGGAU     |
| PLK         | NM_005030               | PLK-6                     | GGUGUUCGCGGGCAAGAUU    |
| PLK         | NM_005030               | PLK-7                     | CUCCUUAAAUAUUUCCGCA    |
| PLK         | NM_005030               | PLK-8                     | AAGAAGAACCAGUGGUUCG    |
| PLK         | NM_005030               | PLK-9                     | CUGAGCCUGAGGCCCGAUA    |
